# Supplementary material
Source: Research Square preprint supplement (doi:10.21203/rs.3.rs-9315959/v1)
Supplement: Supplementary file 1 [file 778f836d9c449d8a73c3b00e.docx]

| **Exchange stiffness** | **Co3Sn2S2** | **Co3Sn2SeS** | **Co3Sn2Se2** |
| --- | --- | --- | --- |
| *A[1,0,0] (meV)* | 339.08 | 299.00 | 270.92 |
| *A[1,1,0] (meV)* | 450.88 | 332.25 | 264.07 |
| *A[1,1,1] (meV)* | 284.50 | 277.24 | 151.20 |
| *ASC (meV)* | 210.53 | 186.74 | 174.08 |
| **Anisotropic energy** | **Co3Sn2S2** | **Co3Sn2SeS** | **Co3Sn2Se2** |
| *K0 (meV)* | 0.59 | 0.82 | 1.19 |
| *K1 (meV)* | -0.60 | -0.83 | -1.2 |
| *K2 (meV)* | 0.003 | 0.002 | 0.001 |
| *K3 (meV)* | 0.001 | -0.001 | -0.023 |
| **Spin-chiral** | **Co3Sn2S2** | **Co3Sn2SeS** | **Co3Sn2Se2** |
| *SCI (meV)* | 0.78 | 0.86 | 0.87 |
| **DMI** | **Co3Sn2S2** | **Co3Sn2SeS** | **Co3Sn2Se2** |
| *D (meV)* | 0.000 | -0.063 | 0.000 |
