# Supplementary material
Source: Research Square preprint supplement (doi:10.21203/rs.3.rs-9315959/v1)
Supplement: Supplementary file 2 [file b678f69eed66499fc9d64e32.pdf]

# Supplementary Information for "Ultra-Stable Weyl Topology Driven by Magnetic Textures in the Shandite Compound $\text{Co}_3\text{Sn}_2\text{S}_{(2-x)}\text{Se}_x$ "

Dang Khoa Le<sup>1\*†</sup>, Eklavya Thareja<sup>1\*†</sup>, Bektur Konushbaev<sup>1†</sup>,  
Gina Pantano<sup>1†</sup>, Tom Saunderson<sup>2,3†</sup>, Manh-Huong Phan<sup>1,4†</sup>,  
Yuriy Mokrousov<sup>2,5†</sup>, Jacob Gayles<sup>1†</sup>

<sup>1</sup>\*Department of Physics, University of South Florida, Tampa, 33620, USA.

<sup>2</sup>Peter Grünberg Institut and Institute for Advanced Simulation,  
Forschungszentrum Jülich and JARA, 52425, Jülich, Germany.

<sup>3</sup>Institut für Physik and Halle-Berlin-Regensburg Cluster of Excellence CCE,  
Martin-Luther-Universität Halle-Wittenberg, D-06099 Halle (Saale), Germany.

<sup>4</sup>Center for Materials Innovation and Technology, VinUniversity, Hanoi,  
100000, Vietnam.

<sup>5</sup>Institute of Physics, Johannes Gutenberg University Mainz, 55099, Mainz,  
Germany.

\*Corresponding author(s). E-mail(s): [kdl222@usf.edu](mailto:kdl222@usf.edu); [ethareja@usf.edu](mailto:ethareja@usf.edu);

Contributing authors: [kb3@usf.edu](mailto:kb3@usf.edu); [gmpantano@usf.edu](mailto:gmpantano@usf.edu);  
[tsaunder@uni-mainz.de](mailto:tsaunder@uni-mainz.de); [huong.pm@vinuni.edu.vn](mailto:huong.pm@vinuni.edu.vn); [phanm@usf.edu](mailto:phanm@usf.edu);  
[y.mokrousov@fz-juelich.de](mailto:y.mokrousov@fz-juelich.de); [gayles@usf.edu](mailto:gayles@usf.edu);

†These authors contributed equally to this work.

## S1. Spin-orbit interactions in noncoplanar calculations

In this Supplementary note, we derive the energy functions for evaluate magnetic interactions via noncollinear and noncoplanar calculations. To demonstrate those interaction, we first consider the magnetic spin configurations as follow:

$$S_i = |S| \begin{bmatrix} \cos(\phi_i) \sin \theta_i \\ \sin(\phi_i) \sin \theta_i \\ \cos \theta_i \end{bmatrix} \quad (1)$$

5 For noncollinear interactions, we utilize the spin spiral calculation embedded in FLEUR  
6 code [1, 2], where the azimuthal angles are described as the following:  $\phi_i = \vec{q} \cdot \vec{R}_i + \alpha_i$  with  
7  $\vec{q}$  is the spin spiral vector,  $\vec{R}_i$  is the position of the  $i^{th}$  magnetic atom and  $\alpha_i$  is the phase-shift  
8 angle.

9 For noncoplanar calculations, the magnetic spin can be described in a similar approach:

$$S_i = (\sin \phi_i \cos \theta_i; \sin \phi_i \sin \theta_i; \cos \theta_i) \quad (2)$$

10 Yet, the change of  $\phi_i$  and  $\theta_i$  depend on the alternation of angle  $\theta$  as written in the  
11 following:  $\theta_i = \{\pi/2 - \theta; 0; 0\}$  and  $\phi_i = \{0; \theta - \theta\}$ .

12 Under the change of spin-orbit coupling (SOC), we consider the following magnetic  
13 interactions in the scheme of Co magnetic atoms in the Kagome net: Dzyaloshinskii-Moriya  
14 interaction (anti-exchange interaction), magnetocrystalline anisotropic energy, and spin-chiral  
15 interaction (one of the topological-chiral interactions that arise from the formation of more  
16 than two magnetic atoms [3]). To investigate the contribution of these magnetic interactions  
17 in our shandite system, we consider the following energy functional:

$$E_{SOC} = E_{SCI} + E_{MAE} + E_{DMI}$$

18 Firstly, we take into account the spin-chiral interaction which originate from the relativis-  
19 tic spin-orbit interaction coupling between magnetic spin of Co atoms) and topological orbital  
20 moment generated from the finite chirality products  $\chi_{ijk} = S_i \cdot (S_j \times S_k)$  arise from the  
21 Kagome net [3]. Hence, the energy function can be written as:

$$E_{SCI} = - \sum_{i(jk)} \chi^{SO} \kappa^{TO} [\vec{S}_i (\vec{S}_j \times \vec{S}_k)] (\vec{\tau}_{ijk} \cdot \vec{S}_i)$$

22 In addition, the direction of this magnetic interaction reply on the surface normal of the  
23 Kagome net  $\tau_{ijk} \sim -const \cdot (0, 0, 1)$  which lie along the z-axis in our shandite system.  
24 Therefore, with our spin configuration as discussed in the Method section, the scalar chirality  
25 product  $\chi_{ijk}$  can be described as follow:

$$\begin{aligned} \chi_{ijk} &= \left(0, 0, \cos\left(\frac{\pi}{2} - \theta\right)\right) \cdot \left[\left(\cos\frac{\theta}{2}, \sin\frac{\theta}{2}, 0\right) \times \left(\cos\left(-\frac{\theta}{2}\right), \sin\left(-\frac{\theta}{2}\right), 0\right)\right] \\ &= (0, 0, \sin \theta) \cdot \left(0, 0, -2 \cos\frac{\theta}{2} \sin\frac{\theta}{2}\right) = -\sin^2(\theta) \end{aligned}$$

26 Hence, the spin-chiral interaction can be written as follow:

$$\sum_{i(jk)} [\vec{S}_i (\vec{S}_j \times \vec{S}_k)] (\vec{\tau}_{ijk} \cdot \vec{S}_i) = \left(0, 0, \cos\left(\frac{\pi}{2} - \theta\right)\right) \cdot (-\sin^2 \theta) = -\sin^3 \theta$$

Because surface normal of the Kagome net is pointing along the z-direction in Cartesian coordinate, the only spin that spun out-of-plane Co<sub>1</sub> with  $\vec{S}_1 = (0, 0, \cos(\frac{\pi}{2} - \theta))$ . This lead to the energy function of spin-chiral interaction can be expressed as

$$E_{SCI} = \chi^{SO} \kappa^{TO} \sin^3 \theta$$

The magneticrystalline anisotropic energy along z-direction can be written as following: 27

$$E_{MAE} = -K_1 [1 - \cos^2(\theta)]$$

where  $K_1$  is the dominant term in MAE as indicated in the main text. In addition, since only Co<sub>1</sub> has out-of-plane components  $\vec{S}_1 = (0, 0, \cos(\frac{\pi}{2} - \theta))$ , we simplify the contribution of  $K_1$  of  $E_{MAE}$  is only one-third compared to the strength of MAE indicated in the main text. 28  
29  
30  
31

Thirdly, DM energy variation can be described as the following: 32

$$E_{DMI} = \sum_{ij} \vec{D}_{ij} \vec{S}_i \times \vec{S}_j$$

With the spin orientation as indicate in the Method section, we obtain the contribution of DMI along z direction as: 33  
34

$$E_{DMI} = -D \sin(\theta)$$

From here, we obtain the fitting energy function for our shandite system as following: 35

$$E = \chi^{SO} \kappa^{TO} \sin^3 \theta - K_1 \sin^2 \theta - D \sin \theta$$

## 36 **S2. Band structures and DOS of magnetic Weyl nodes**

37 We observe the Weyl nodes in the ferromagnetic states of  $\text{Co}_3\text{Sn}_2\text{SeS}$  compound. Up to  $\phi =$   
38  $72^\circ$ , the magnetic Weyl nodes still remain a Type-I crossing. Until  $\phi = 108^\circ$ , the double-  
39 crossing feature in its electronic band structure emerged.

40 Under homogenous spin spiral, magnetic Weyl cones in  $\text{Co}_3\text{Sn}_2\text{Se}_2$  demonstrate a similar  
41 trend compared to that in  $\text{Co}_3\text{Sn}_2\text{S}_2$ . Topological phase transitions occur from Type-I ( $\phi =$   
42  $0^\circ$ ) to Type-II ( $\phi = 72^\circ$ ) and ultimately reach gapped state ( $\phi = 108^\circ$ ).

43 In the case of  $q=[1,1,0]$  direction, we observe that the magnetic Weyl crossings reached  
44 gapped state in smaller angle  $\phi$  as  $\phi \geq 60^\circ$  for all shandite compounds. However, under the  
45 spin-spiral propagation  $q=[1,1,1]$ , the behavior of Weyl crossing in all shandite compounds  
46 are similar to the  $q=[1,0,0]$  case as indicated in the main text.

47 We demonstrate the change in energy in red and blue color. Black lines indicate the energy  
48 bands without the effect of SOC. Red/blue dots indicate energy bands are shifted up/down,  
49 respectively. The size of dots display how much the energy bands changed compared to the  
50 electronic bands without SOC.

51 For a small angle of rotation, the energy bands describing the Weyl nodes remain  
52 unchanged. In the case of finite rotation, the bands below the Weyl nodes appear to shift  
53 downward in energy below  $-0.5 \text{ eV}$  and significantly flatten, where the bands above also  
54 shift downward forming extra crossings in the region of Weyl cones. The effect of SOC  
55 perturbation does not gap the bands.

## 56 **References**

- 57 [1] Wimmer, E., Krakauer, H., Weinert, M. & Freeman, A. J. Full-potential self-consistent  
58 linearized-augmented-plane-wave method for calculating the electronic structure of  
59 molecules and surfaces:  $\text{o}_2$  molecule. *Phys. Rev. B* **24**, 864–875 (1981).  
60 [2] The FLEUR project. <https://www.flapw.de/>.  
61 [3] Grytsiuk, S. *et al.* Topological–chiral magnetic interactions driven by emergent orbital  
62 magnetism. *Nature communications* **11**, 511 (2020).

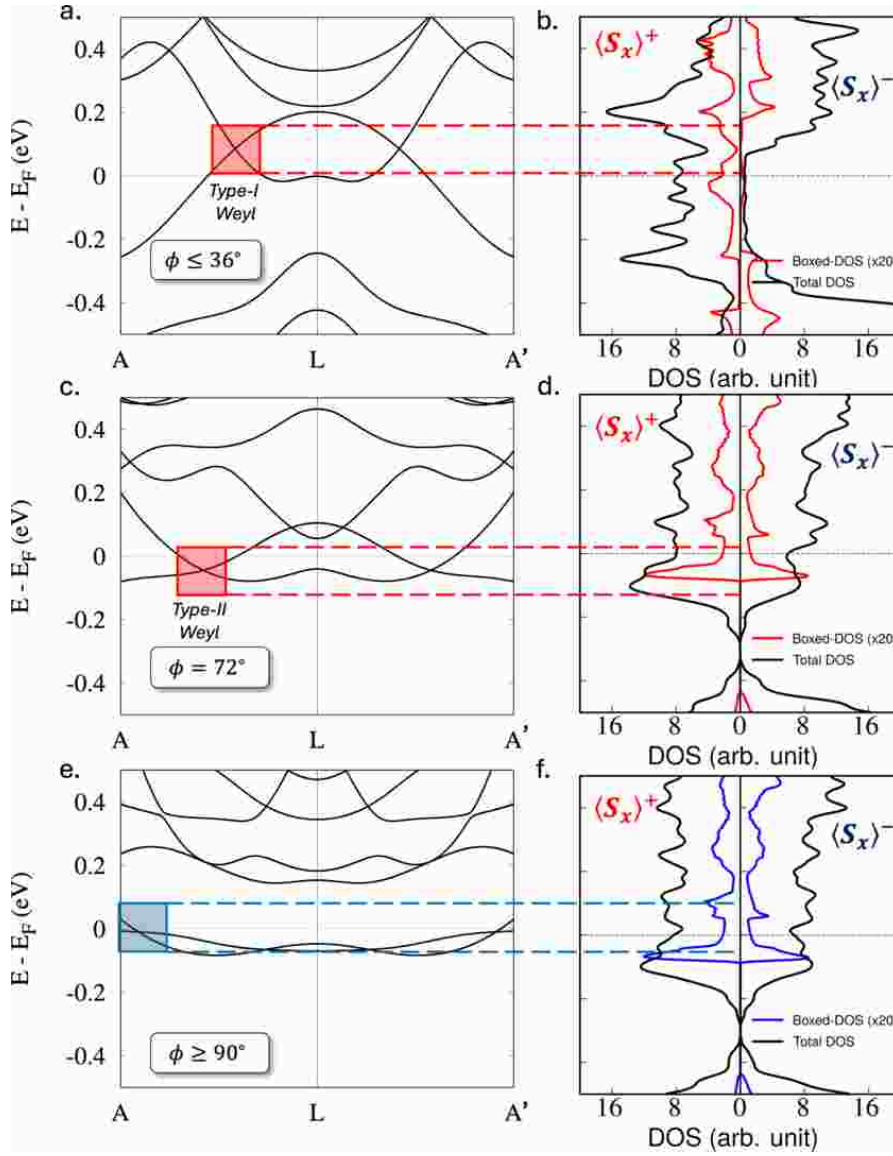

**Supplementary Figure S1** Electronic band structures and density of states (DOS) of  $\text{Co}_3\text{Sn}_2\text{Se}_5$  with different homogeneous spin spiral angle  $\phi$  as indicated in previous section. Band structure and DOS are illustrated for  $\phi = 0^\circ$  in (a-b),  $\phi = 72^\circ$  in (c-d) and  $\phi = 108^\circ$  in (e-f), respectively. The left and right panel in DOS are spin projection along the x-direction.

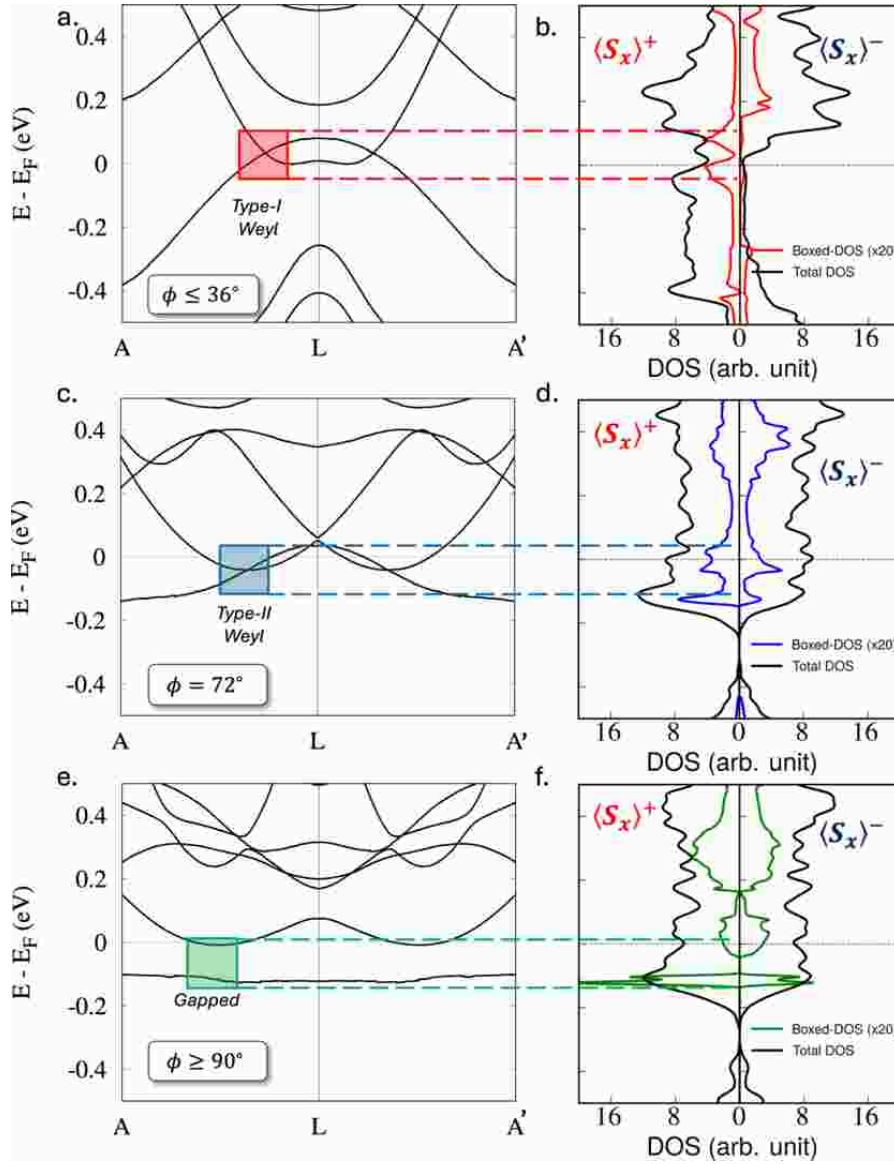

**Supplementary Figure S2** Electronic band structures and density of states (DOS) of  $\text{Co}_3\text{Sn}_2\text{Se}_2$  with different homogeneous spin spiral angle  $\phi$  as indicated in previous section. Band structure and DOS are illustrated for  $\phi = 0^\circ$  in (a-b),  $\phi = 72^\circ$  in (c-d) and  $\phi = 108^\circ$  in (e-f), respectively. The left and right panel in DOS are spin projection along the x-direction.

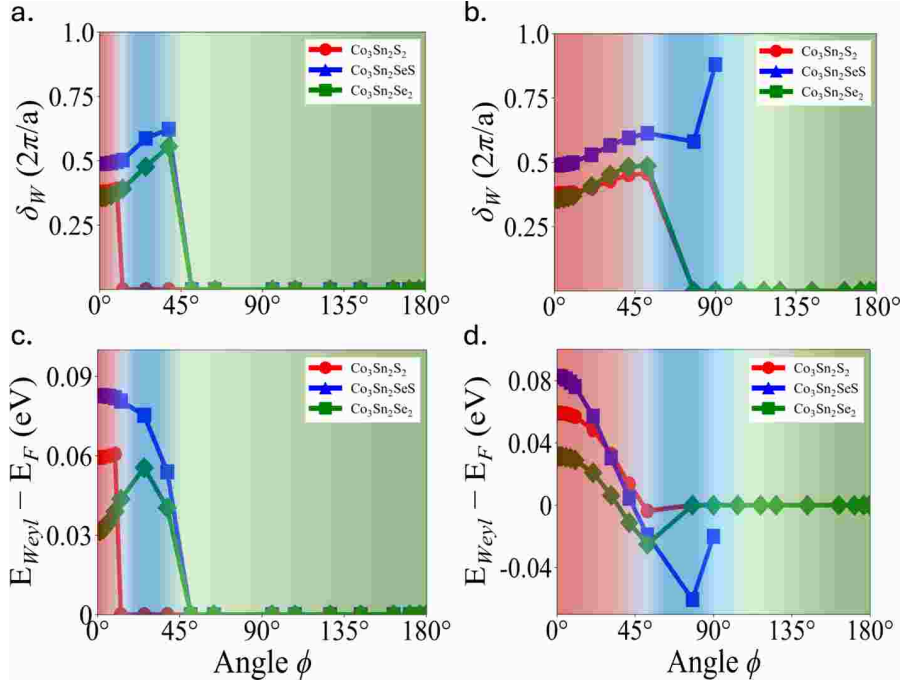

**Supplementary Figure S3** Topological phase transitions of  $\text{Co}_3\text{Sn}_2\text{S}_{2-x}\text{Se}_x$  are revealed, where  $\text{Co}_3\text{Sn}_2\text{S}_2$ ,  $\text{Co}_3\text{Sn}_2\text{SeS}$ , and  $\text{Co}_3\text{Sn}_2\text{Se}_2$  are in red, blue and green lines, respectively. (a,b) Distance between two Weyl crossings is plotted as a function of the spin spiral angle  $\phi$  (along the direction  $q = [1, 1, 0]$  and  $q = [1, 1, 1]$ , respectively). (c,d) Position of the Weyl pairs with respect to the Fermi energy as a function of both the mentioned directions.

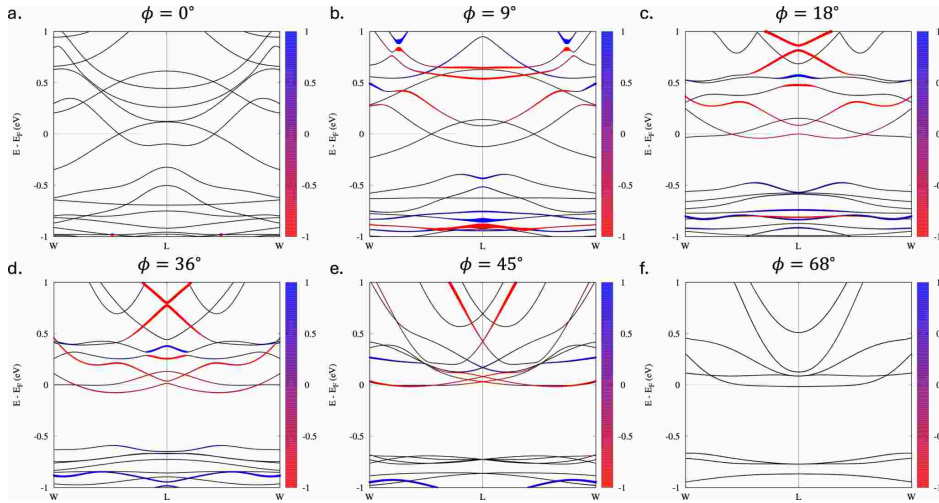

**Supplementary Figure S4** Electronic band structure of  $\text{Co}_3\text{Sn}_2\text{SeS}$  under the influence of SOC. Band structure showing Weyl nodes are illustrated for (a)  $\phi = 0^\circ$ , (b)  $\phi = 18^\circ$ , (c)  $\phi = 36^\circ$ , (d)  $\phi = 72^\circ$ , (e)  $\phi = 90^\circ$  and (f)  $\phi = 136^\circ$ .
